# Supplementary material
Source: MDPI journal article supplement (https://www.mdpi.com/2073-4395/13/8/2001)

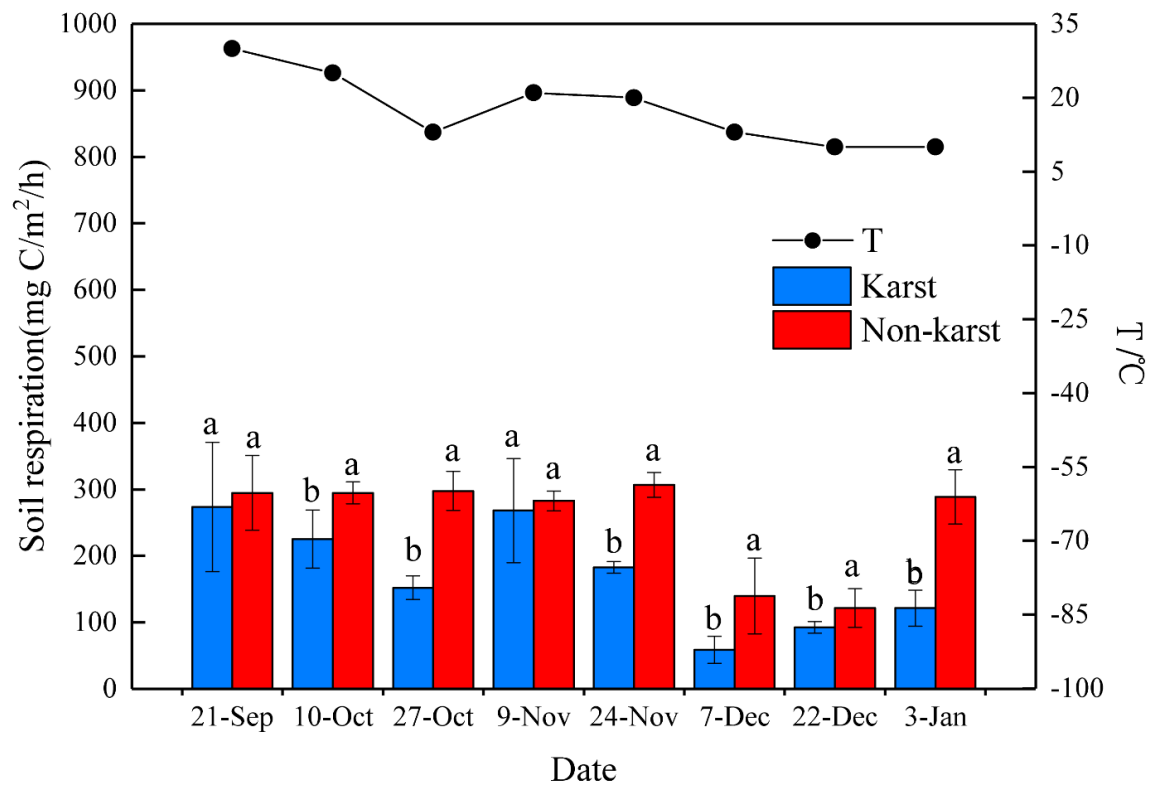

Figure S1: The soil respiration of paddy fields during fallow.

Supplement: s1 [file s1 › agronomy-2507720-supplementary.pdf]
